# Supplementary material for: Coronavirus Receptor Expression Profiles in Human Mast Cells, Basophils, and Eosinophils
Source: MDPI journal article supplement (doi:10.3390/cells13020173), 2024-01-17
Supplement: s1 [file s1]

# **Coronavirus Receptor Expression Profiles in Human Mast Cells, Basophils and Eosinophils (Degenfeld-Schonburg et al.)**

## **Supplemental Material and Methods**

### **Quantitative polymerase chain reaction (qPCR)**

RNA was isolated from mast cell (MC)-related cell lines (HMC-1.1, HMC-1.2, ROSA<sup>KIT WT</sup>, ROSA<sup>KIT D816V</sup>, ROSA<sup>KIT K509I</sup>, MCPV-1.1 through MCPV-1.4), the basophil (BA) cell line KU812, and the eosinophil (EO)-related cell line EOL-1, using the RNeasy MinElute Cleanup Kit or RNeasy Plus Mini Kit (Qiagen, Hilden, Germany). cDNA was synthesized using Moloney murine leukemia virus reverse transcriptase and random primers (both from Invitrogen, Carlsbad, CA). To confirm expression of transcripts (mRNA) specific for aminopeptidase-N (CD13), dipeptidylpeptidase IV (DPPIV, CD26), basigin (BSG, CD147), ACE2, ABL1, and ABL2 in our cell lines, qPCR experiments were conducted as reported [1-3] using primers listed in Supplementary Table S2. qPCR was performed on a QuantStudio 3 Real-Time PCR System (Thermo Fisher Scientific, Waltham, MA, USA) using iTaq Universal SYBR Green Supermix (Bio-Rad, Hercules, CA, USA) and plasmid standards. CD13, CD26, CD147, ACE2, ABL1, and ABL2 mRNA copy numbers were normalized to beta-glucuronidase (GUSB) mRNA copy numbers and were expressed as percent of GUSB. The results are shown as a semi-quantitative scoring system to discriminate between clearly positive expression (+, >3%), clearly negative results (-, <1.49%) and slightly positive expression (+/-, 1.49%-3%).

## Supplementary Figures

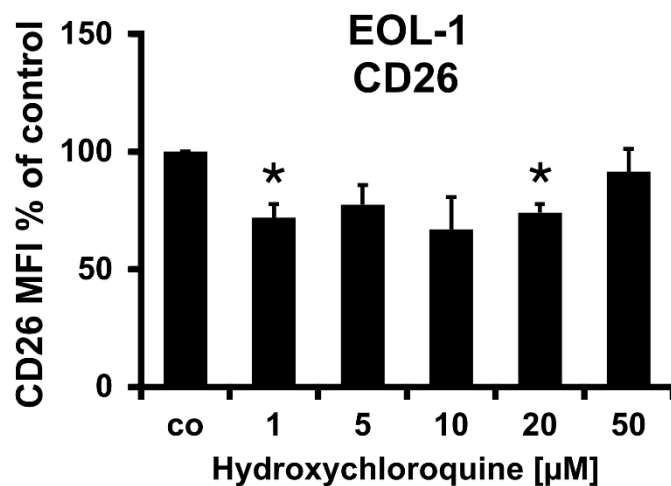

### Supplementary Figure S1.

Effects of hydroxychloroquine on the expression of CD26 on EOL-1 cells.

EOL-1 cells were incubated in control medium alone (co) or medium supplemented with different concentrations of hydroxychloroquine (1–50  $\mu$ M) for 24 hours at 37°C. Thereafter, cells were stained with the PE-conjugated antibody M-A261 directed against the CoV-R, CD26. Expression of CD26 was determined by flow cytometry measuring the median fluorescence intensity (MFI). CD26 expression levels are expressed as MFI in percent of control. Results represent the mean  $\pm$  S.D. of 3 independent experiments. Asterisk (\*):  $P < 0.05$  compared to control as assessed by one-way ANOVA followed by Bonferroni's post hoc comparison test. The solvent control (DMSO) did not show any downregulating effect on expression of CD26 on EOL-1 cells ( $112 \pm 13\%$  of medium co). Abbreviations: CoV-R, coronavirus receptor; ANOVA, analysis of variance; DMSO, dimethyl sulfoxide.

## Supplementary Tables

### Supplementary Table S1

Specification of Monoclonal Antibodies used in this Study

| CD     | Antigen         | Clone     | Isotype      | Conjugate | Specificity | Company         |
|--------|-----------------|-----------|--------------|-----------|-------------|-----------------|
| n.c.   | isotype control | MOPC-21   | mouse, IgG1  | PE        | human       | BD Biosciences  |
| n.c.   | isotype control | 20102     | mouse, IgG2A | PE        | human       | R&D Systems     |
| CD13   | APN             | WM15      | mouse, IgG1  | PE        | human       | BD Biosciences  |
| CD14   | LPSR            | TÜK4      | mouse, IgG2A | FITC      | human       | Dako            |
| CD26   | DPPIV           | M-A261    | mouse, IgG1  | PE        | human       | BD Biosciences  |
| CD34   | HPCA-1          | 581       | mouse, IgG1  | PB        | human       | BioLegend       |
| CD38   | T10             | HIT2      | mouse, IgG1  | APC       | human       | BD Biosciences  |
| CD45   | LCA             | HI30      | mouse, IgG1  | APC-Cy7   | human       | BioLegend       |
| CD45   | LCA             | 2D1       | mouse, IgG1  | PerCP     | human       | BD Biosciences  |
| CD45   | LCA             | HI30      | mouse, IgG1  | V500      | human       | BD Biosciences  |
| CD117  | SCFR/KIT        | 104D2     | mouse, IgG1  | PE-Cy7    | human       | invitrogen      |
| CD123  | IL-3RA          | 6H6       | mouse, IgG1  | PE-Cy7    | human       | BioLegend       |
| CD147  | BSG             | HIM-6     | mouse, IgG1  | PE        | human       | BioLegend       |
| CD147  | BSG             | HIM-6     | mouse, IgG1  | PE        | human       | BD Biosciences  |
| CD203c | E-NPP3          | FR3-16A11 | mouse, IgG1  | APC       | human       | Miltenyi Biotec |
| n.c.   | Siglec-8        | 837535    | mouse, IgG1  | PE        | human       | R&D Systems     |

Abbreviations: APN, aminopeptidase N; APC, allophycocyanin; BD, Becton Dickinson; BSG, basigin; CD, cluster of differentiation; Cy, cyanine dye; DPPIV, dipeptidyl-peptidase IV; E-NPP3, ectonucleotide pyrophosphatase/phosphodiesterase-3; FITC, fluorescein isothiocyanate; HPCA-1, human precursor cell antigen-1; Ig, immunoglobulin; IL-3RA, interleukin-3 receptor alpha chain; LCA, leukocyte common antigen; LPSR, lipopolysaccharide; n.c., not (yet) clustered; PB, pacific blue; PE, phycoerythrin; PerCP, peridinin chlorophyll protein; SCFR, stem cell factor receptor.

Company Locations: BD Biosciences, San José, CA, USA; BioLegend, San Diego, CA, USA; Dako, Glostrup, Denmark; Miltenyi Biotec, Bergisch Gladbach, Germany; R&D Systems, Minneapolis, MN, USA.

## Supplementary Table S2

Primer sequences used for quantitative real time PCR

| Gene                |         | Sequence (5' -> 3')        |
|---------------------|---------|----------------------------|
| <i>ACE2</i>         | forward | CAAAGTTCACCTTGCTTCTTGGA    |
|                     | reverse | ACCATTTGTCCCCAGCATTA       |
| <i>ABL1</i>         | forward | TGTATGATTTTGTGGCCAGTGGAG   |
|                     | reverse | GCCTAAGACCCGGAGCTTTTCA     |
| <i>ABL2</i>         | forward | TGGACAGCACCAGAGAGTCTT      |
|                     | reverse | GGTAGCAATTTCCCACAACAA      |
| <i>ANPEP</i> (CD13) | forward | GCGAGTACATGGAGGGCAAT       |
|                     | reverse | TCGAAGCATGGGAAGGACTT       |
| <i>DPPIV</i> (CD26) | forward | TCAATATCTCCTGATGGGCAGTTT   |
|                     | reverse | TGTCATATGAAGCTGTGTAGGAATGC |
| <i>BSG</i> (CD147)  | forward | TCACTGACTGGGCCTGGTA        |
|                     | reverse | TCACGAAGAACCTGCTCTCG       |
| <i>GUSB</i>         | forward | GGGCTTCGAGGAGCAGTGG        |
|                     | reverse | GCTGGAGGGAACCTGGCATGT      |

Abbreviations: PCR, polymerase chain reaction.

## Supplementary References

1. Smiljkovic, D.; Herrmann, H.; Sadovnik, I.; Gamperl, S.; Berger, D.; Stefanzl, G.; Eisenwort, G.; Hoermann, G.; Kopanja, S.; Dorofeeva, Y.; et al. Expression and regulation of Siglec-6 (CD327) on human mast cells and basophils. *J. Allergy Clin. Immunol.* 2023, 151(1), 202-211, doi:10.1016/j.jaci.2022.07.018.
2. Herrmann, H.; Cerny-Reiterer, S.; Gleixner, K.V.; Blatt, K.; Herndlhofer, S.; Rabitsch, W.; Jäger, E.; Mitterbauer-Hohendanner, G.; Streubel, B.; Selzer, E.; et al. CD34(+)/CD38(-) stem cells in chronic myeloid leukemia express Siglec-3 (CD33) and are responsive to the CD33-targeting drug gemtuzumab/ozogamicin. *Haematologica* 2012, 97, 219-226, doi:10.3324/haematol.2010.035006.
3. Herrmann, H.; Sadovnik, I.; Cerny-Reiterer, S.; Rüllicke, T.; Stefanzl, G.; Willmann, M.; Hoermann, G.; Bilban, M.; Blatt, K.; Herndlhofer, S.; et al. Dipeptidylpeptidase IV (CD26) defines leukemic stem cells (LSC) in chronic myeloid leukemia. *Blood* 2014, 123, 3951-3962, doi:10.1182/blood-2013-10-536078.
